# Supplementary material
Source: Springer Nature journal article supplement (https://www.springermedizin.de/resource/supplementary/12936_2013_3122_MOESM8_ESM.pdf/9546210)

# Vivax malaria cases

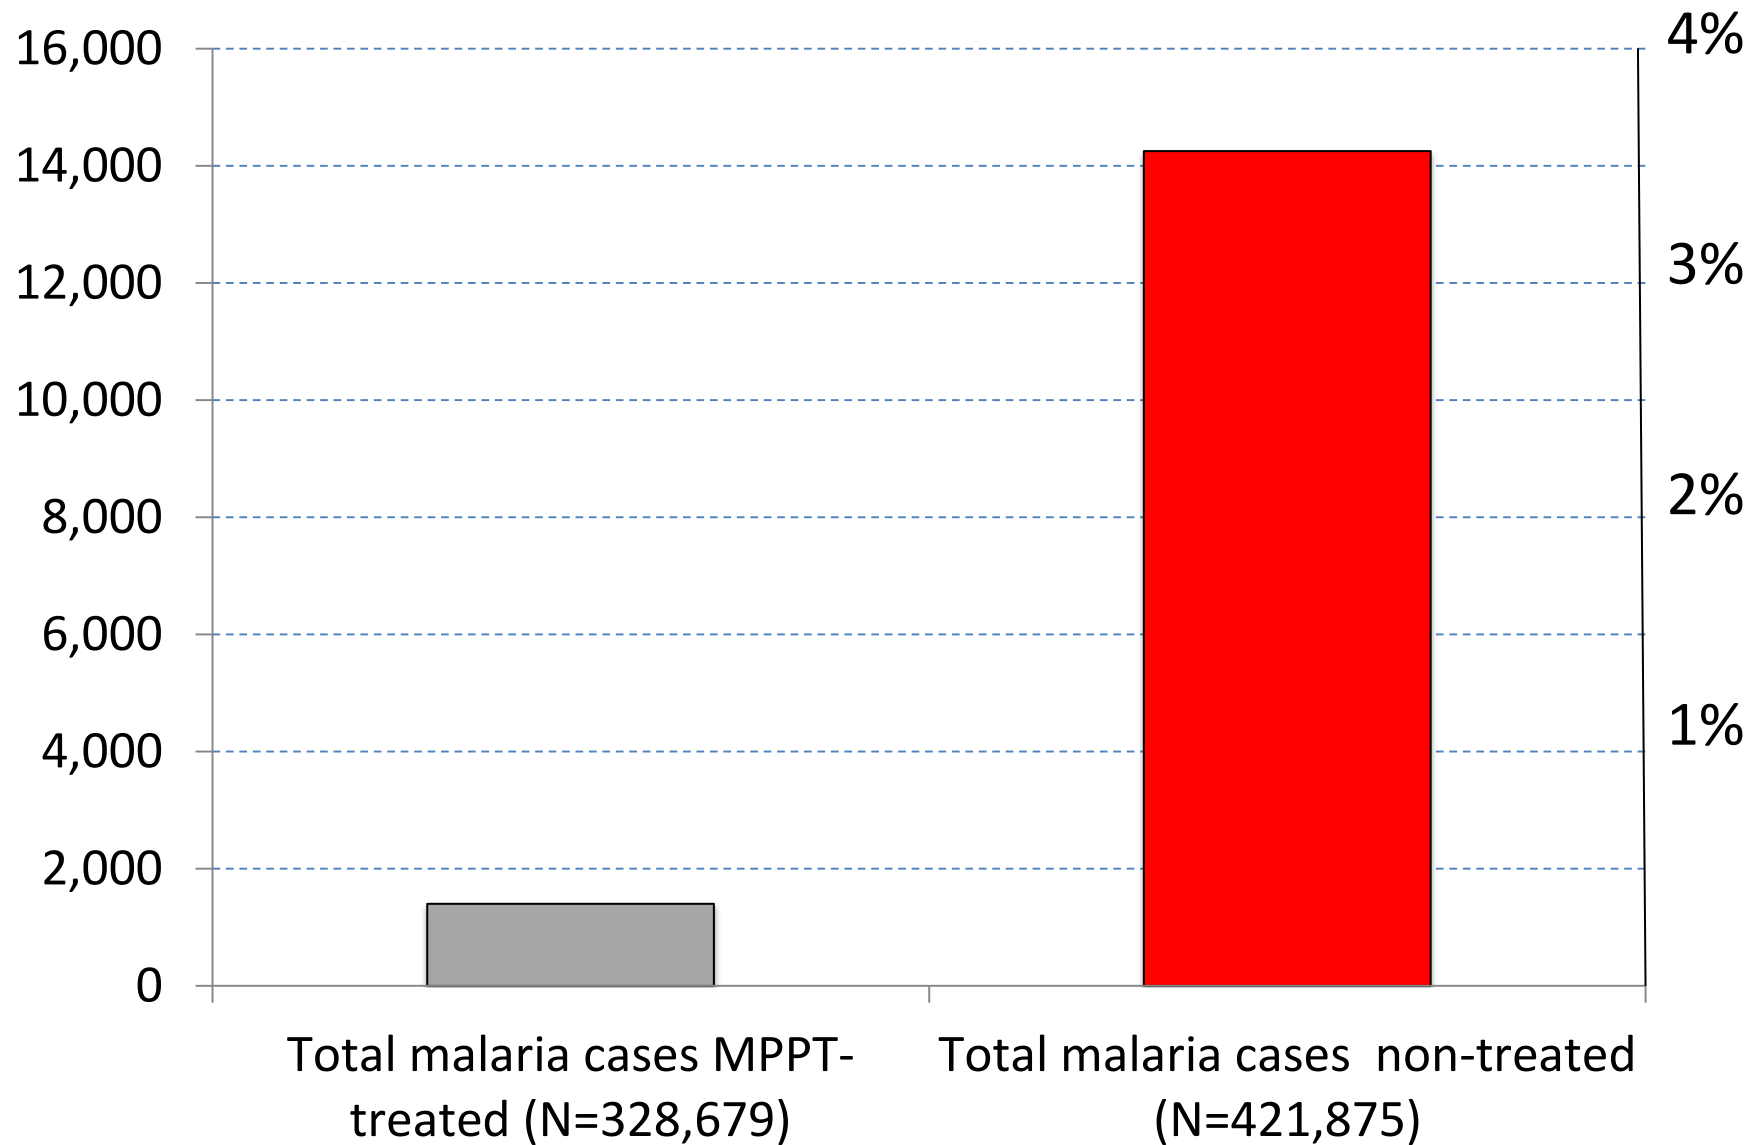

Supplement: MOESM8 [file 9546210]
